# Supplementary material for: Single-atom catalyst with a hollow rod/plate-like structure for enhanced oxygen reduction reaction performance in zinc–air batteries
Source: Royal Society of Chemistry journal article supplement (doi:10.1039/d4ta07734b), 2025-01-01
Supplement: d4ta07734b1.pdf [file d4ta07734b1.pdf]

## Single-atom Catalysts with Hollow Rod/Plate like Structure for Enhanced Oxygen Reduction Reaction Performance in Zinc Air Battery

Muhammad Arif Khan<sup>1, a</sup>, Guopu Cai<sup>1, b</sup>, Rida Javed<sup>d</sup>, Daixin Ye<sup>c, \*</sup>, and Hongbin Zhao<sup>b, \*</sup>, and Jiujun Zhang<sup>c</sup>

*a School of Materials Science and Engineering, Shanghai University, Shanghai 200444, PR China;*

*b Department of Chemistry, College of Sciences, Shanghai University, Shanghai 200444, PR China;*

*c College of Sciences & Institute for Sustainable Energy, Shanghai University, Shanghai 200444, PR China;*

*d College of Materials science and Engineering, Shenzhen university, Shenzhen, Guangdong, PR China;*

## Experimental

### Synthesis of Co-N-C SAC

Cobalt hydroxide nanoplates  $\text{Co}(\text{OH})_2$  were synthesized through hydrothermal method. In an experiment, 60 ml of DI water was taken in a beaker and 2.18 g of  $\text{CoCl}_2 \cdot 6\text{H}_2\text{O}$  was dissolved in it through ultra-sonication for 3 minutes. After that 3 ml of the  $\text{N}(\text{CH}_2\text{CH}_3)_3$  was added to the above solution and stirred for 2 h. It was then transferred to 100 ml Teflon vessel and hydrothermal treatment was done at  $180^\circ\text{C}$  for 24 h. The pink precipitate obtained after centrifugation with ethanol and DI water followed by drying at  $80^\circ\text{C}$  on oven is named as  $\text{Co}(\text{OH})_2$  nanoplates.

In the second step, 300 mg of  $\text{Co}(\text{OH})_2$  nanoplates and 15 mg of SDS were dispersed in 100 ml of DI water through stirring at room temperature for 4 h. Aniline monomer (90  $\mu\text{L}$ ), 1 ml  $\text{H}_2\text{SO}_4$  solution (0.1 M), and 250 mg of APS were added to the above solution

and stirred for 2 h to complete the aniline polymerization. A black precipitate was obtained through centrifugation with DI water and ethanol followed by drying at 80°C. Co-N-C SAC was obtained after pyrolysis at 500°C for 2 h followed by acid leaching.

### **Synthesis of Ni-N-C SAC**

Nickel hydroxide nanoplates  $\text{Ni}(\text{OH})_2$  were synthesized through hydrothermal method. In an experiment, 60 ml of DI water was taken in a beaker and 1.98 g of  $\text{NiCl}_2 \cdot 6\text{H}_2\text{O}$  was dissolved in it through ultra-sonication for 3 minutes. After that 3 ml of the  $\text{N}(\text{CH}_2\text{CH}_3)_3$  was added to the above solution and stirred for 2 h. It was then transferred to 100 ml Teflon vessel and hydrothermal treatment was done at 170°C for 24 h. The green precipitate obtained after centrifugation with ethanol and DI water followed by drying at 80°C on oven is named as  $\text{Ni}(\text{OH})_2$  nanoplates.

The Ni-N-C SAC formation process is same as explained for Co-N-C SAC.

### **Synthesis of Mn-N-C SAC**

Hydrothermal method was used to synthesize Manganese oxide ( $\text{MnO}_2$ ) nanorods. In an experiment, 1.69 g of  $\text{MnSO}_4 \cdot \text{H}_2\text{O}$ , 0.275 g of  $(\text{NH}_4)_2\text{S}_2\text{O}_8$ , and 0.315 g of  $(\text{NH}_4)_2\text{S}_2\text{O}_8$  were added in 60 ml of DI water and stirred for 3 h. This solution was hydrothermally treated at 160°C for 16 h. The black precipitate obtained after centrifugation with ethanol and DI water followed by drying at 80°C is named as  $\text{MnO}_2$  nanorods.

The synthesis process for Mn-N-C SAC is same as described for Co-N-C SAC.

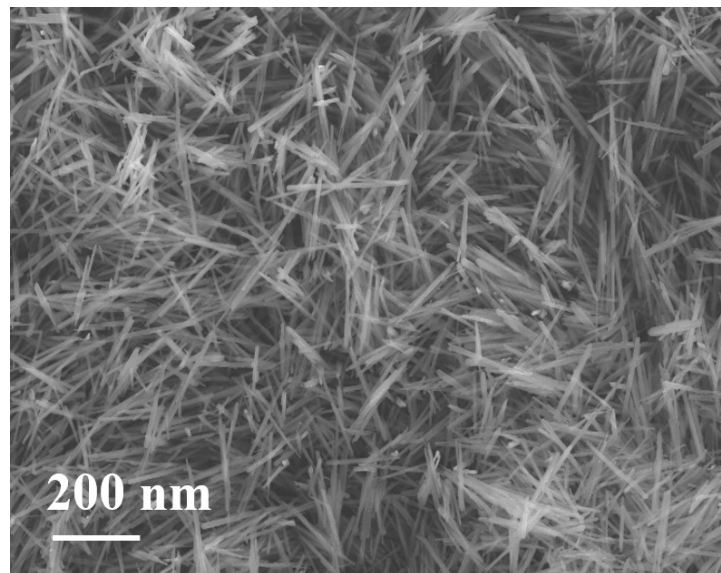

**Fig. S1.** SEM image for FeOOH.

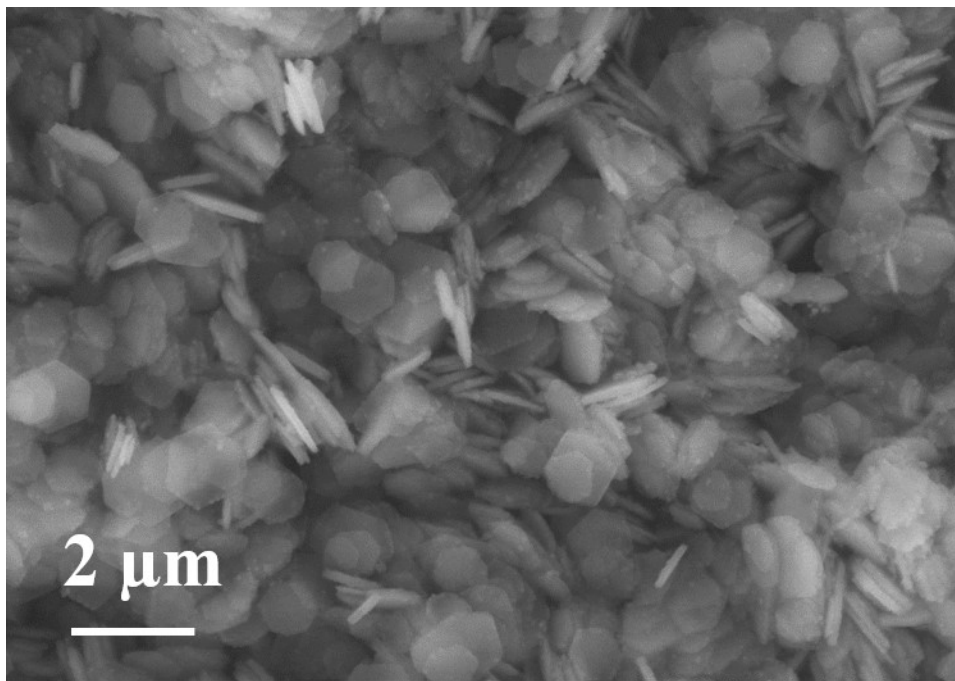

**Fig. S2.** SEM of  $\text{Co(OH)}_2$ .

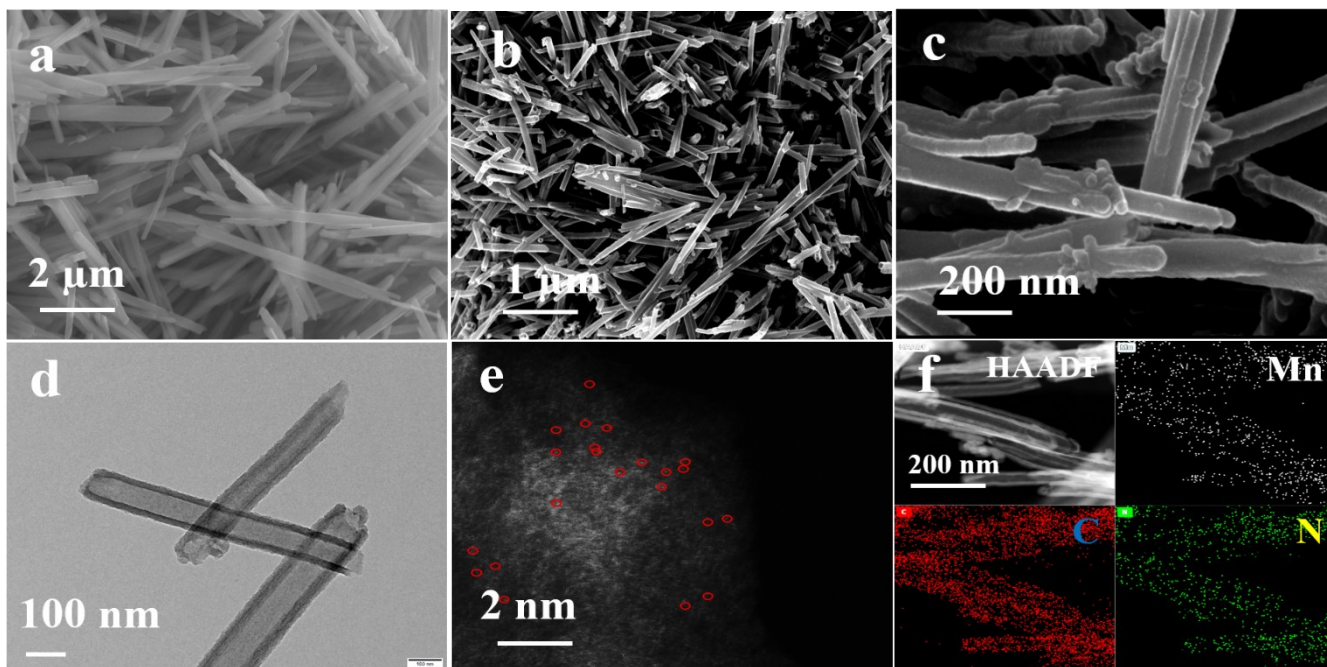

**Fig. S3.** (a) SEM of MnO<sub>2</sub>; (b,c) SEM of Mn-N-C SAC; (d) TEM of Mn-N-C SAC; (e) Aberration corrected HAADF-STEM image of Mn-N-C SAC; (f) HAADF-STEM image and corresponding EDX mapping of Mn-N-C SAC.

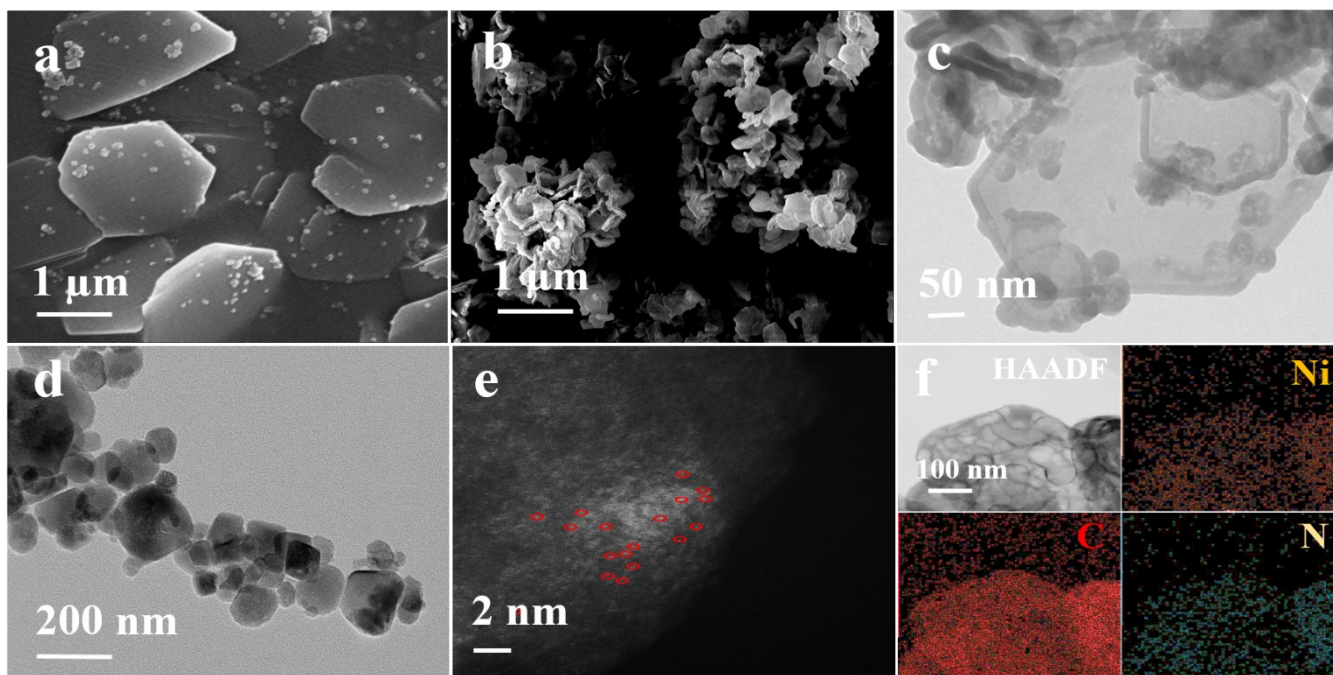

**Fig. S4.** (a) SEM of Ni(OH)<sub>2</sub>; (b) SEM of Ni-N-C SAC; (c, d) TEM of Ni-N-C SAC; (e) Aberration corrected HAADF-STEM image of Ni-N-C SAC; (f) HAADF-STEM image and corresponding EDX mapping of Ni-N-C SAC.

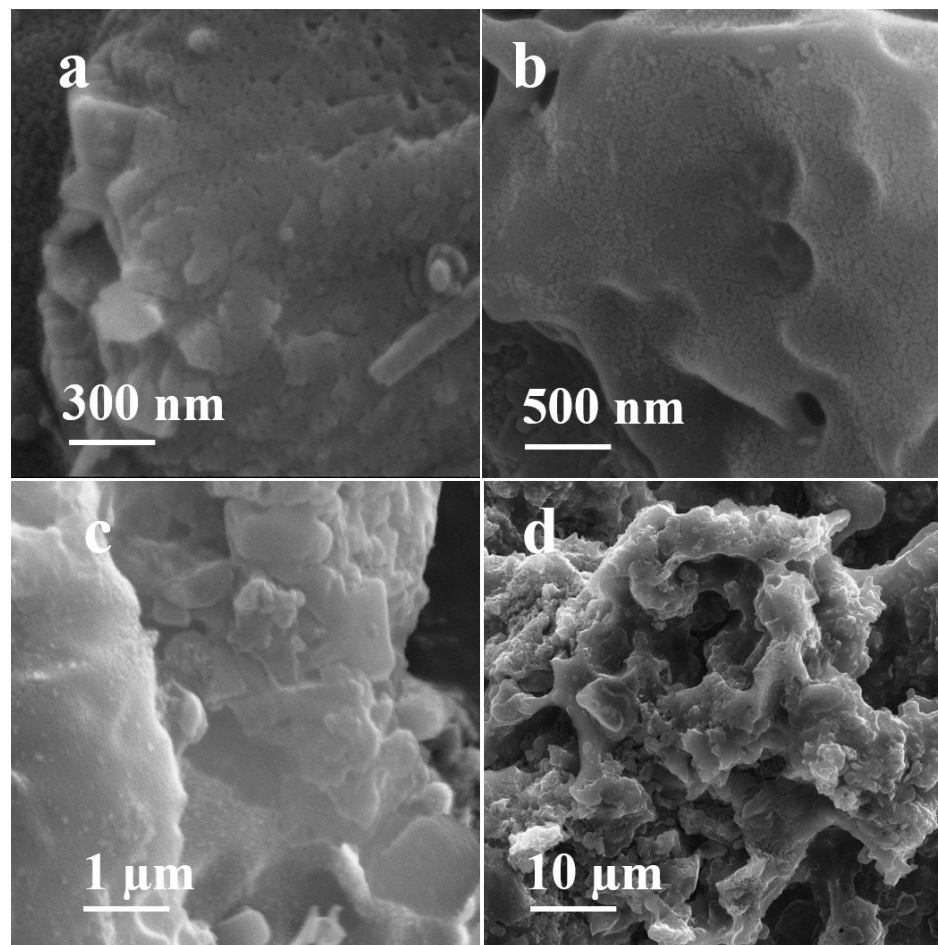

**Fig. S5.** SEM of NC sample.

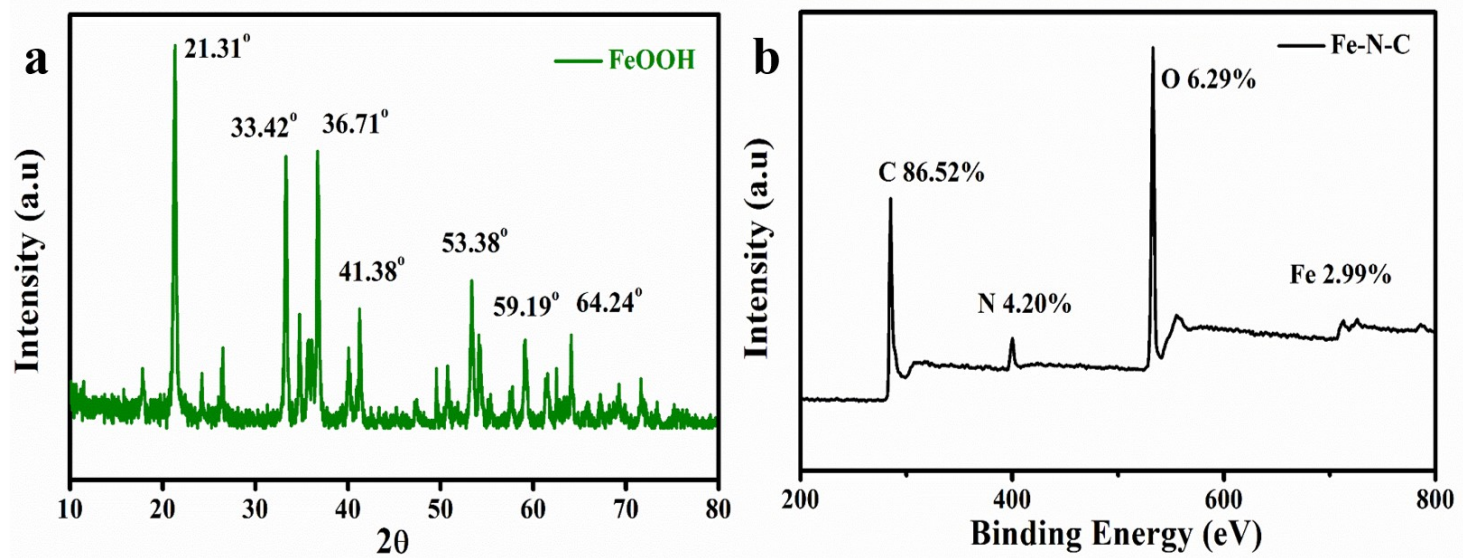

Fig. S6. (a) XRD of FeOOH; (b) XPS survey of Fe-N-C SAC.



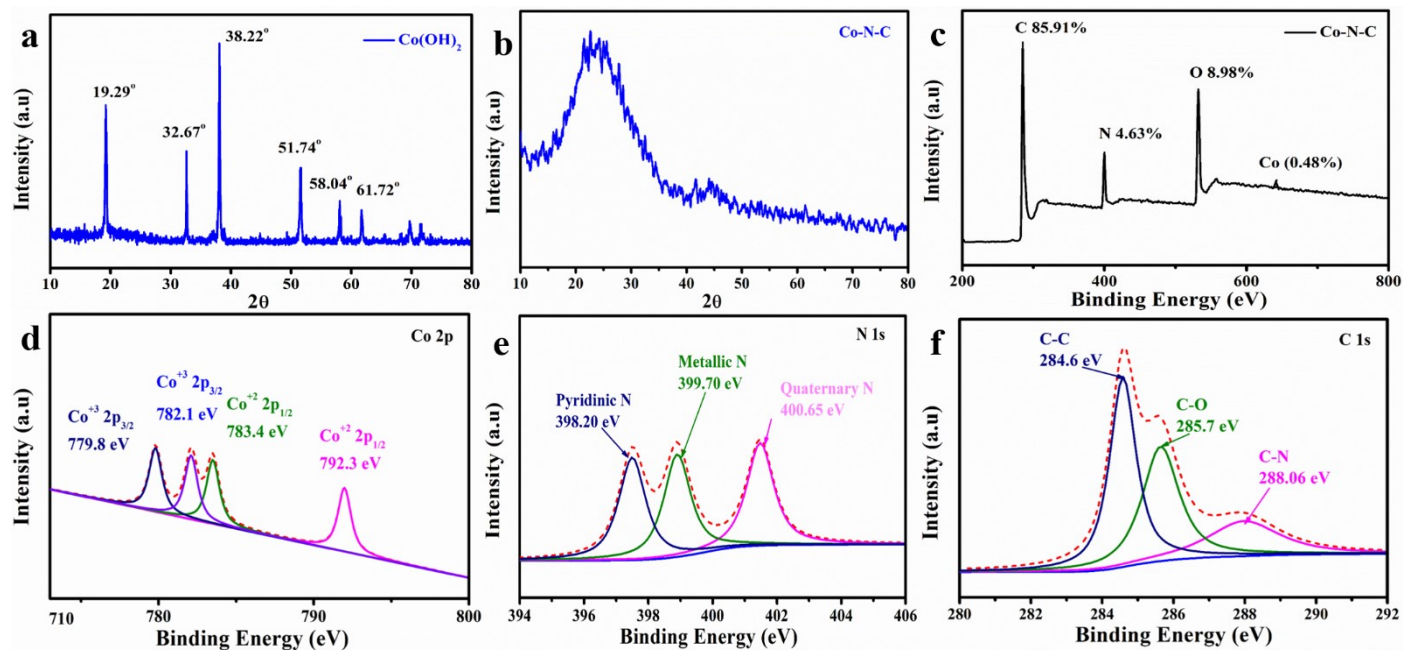

**Fig. S7.** XRD pattern of (a)  $\text{Co(OH)}_2$ ; (b) Co-N-C SAC; (c) XPS survey of Co-N-C SAC; (d-f) Co 2p, N 1s, and C 1s of Co-N-C SAC.

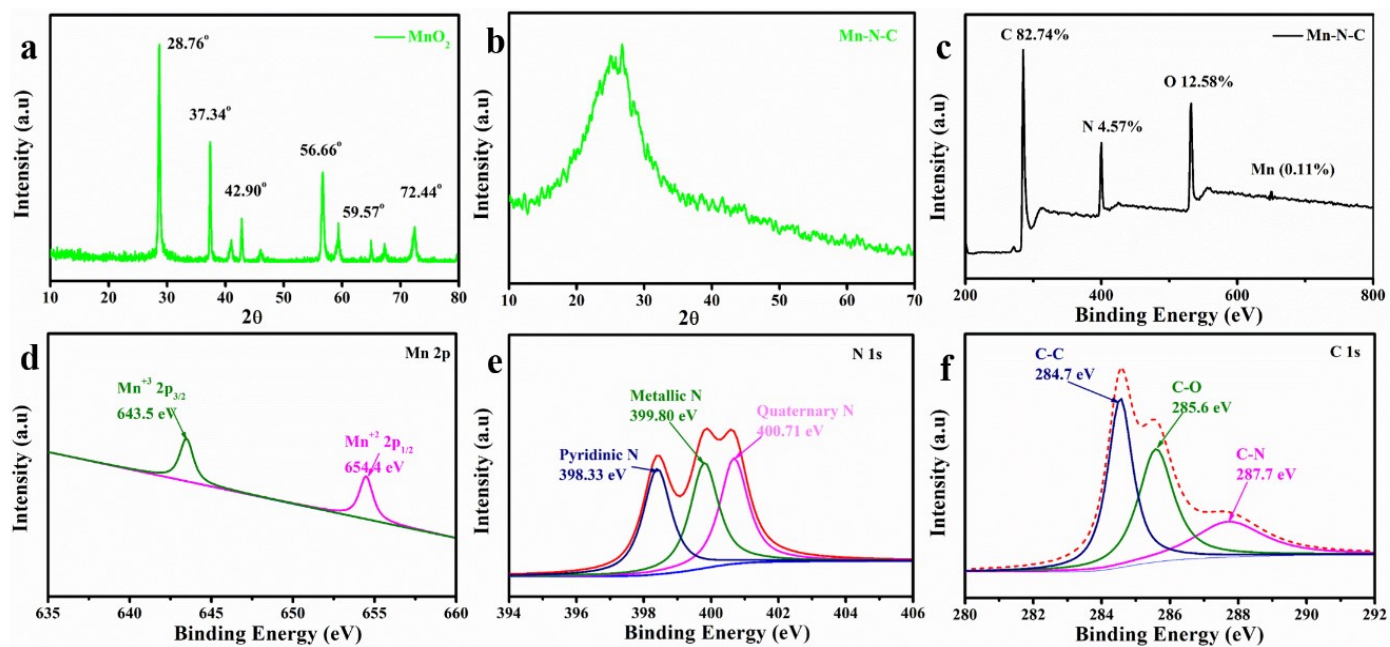

**Fig. S8.** XRD pattern of (a) MnO<sub>2</sub>; (b) Mn-N-C SAC; (c) XPS survey of Mn-N-C SAC; (d-f) Mn 2p, N 1s, and C 1s of Mn-N-C SAC.

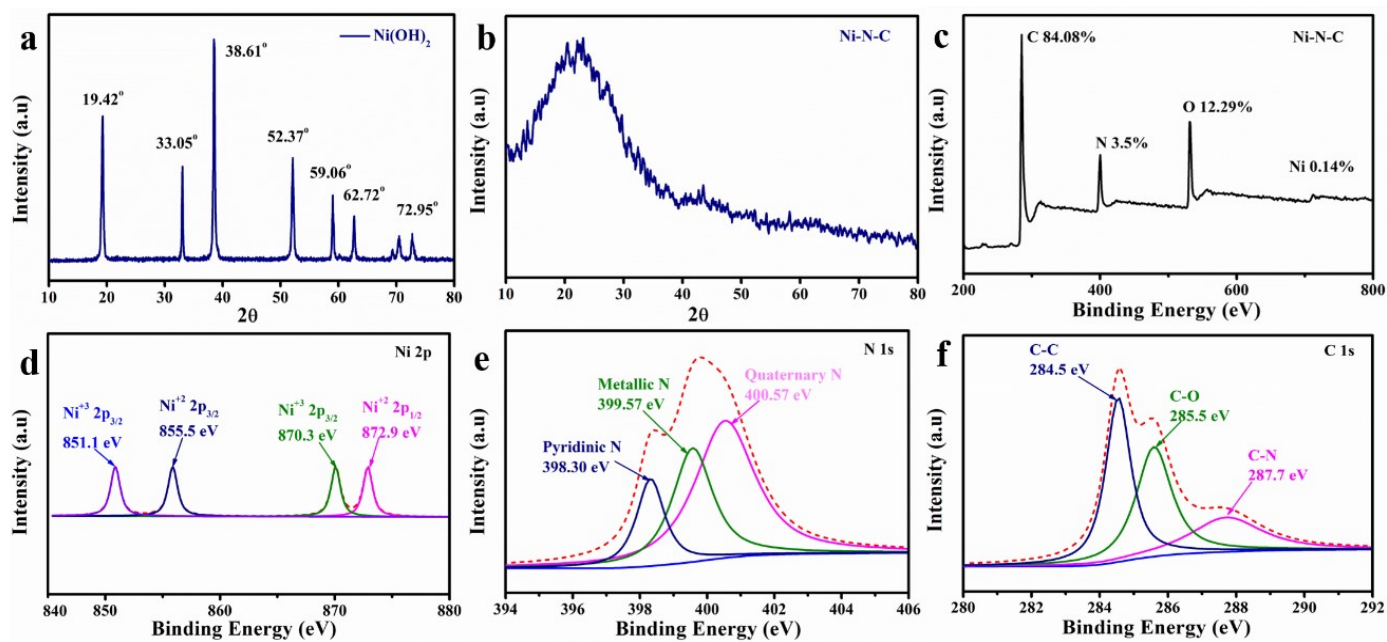

**Fig. S9.** XRD pattern of (a)  $\text{Ni(OH)}_2$ ; (b) Ni-N-C SAC; (c) XPS survey of Ni-N-C SAC; (d-f) Ni 2p, N 1s, and C 1s of Ni-N-C SAC.

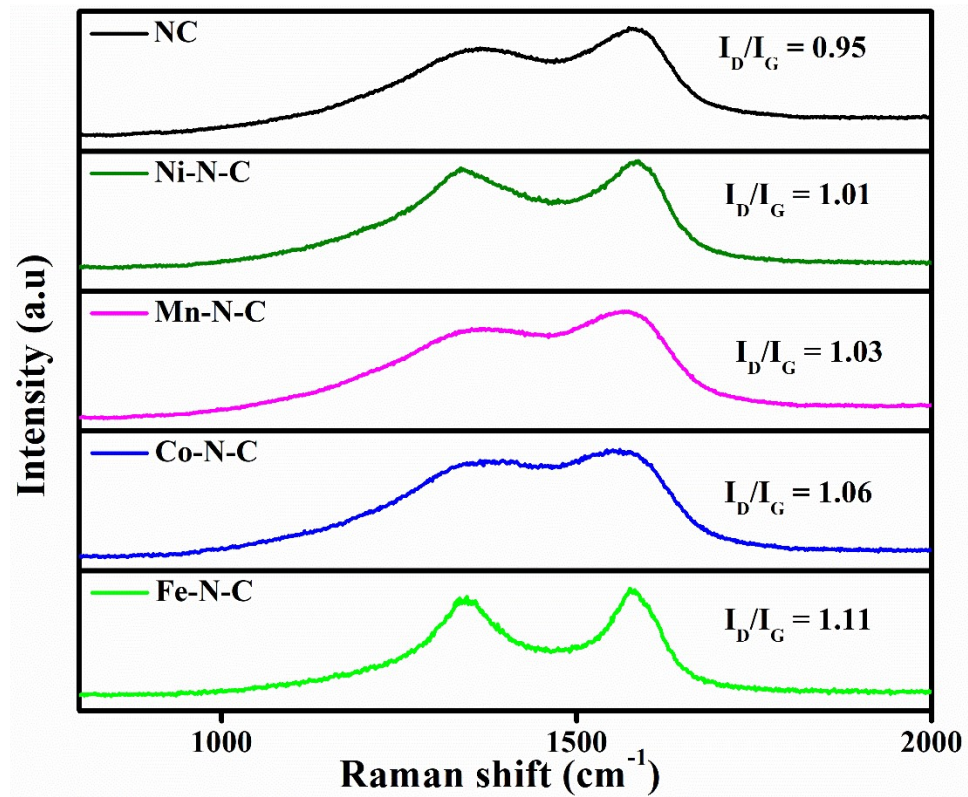

Fig. S10. Raman analysis results for Fe-N-C, Co-N-C, Mn-N-C, Ni-N-C, and NC.

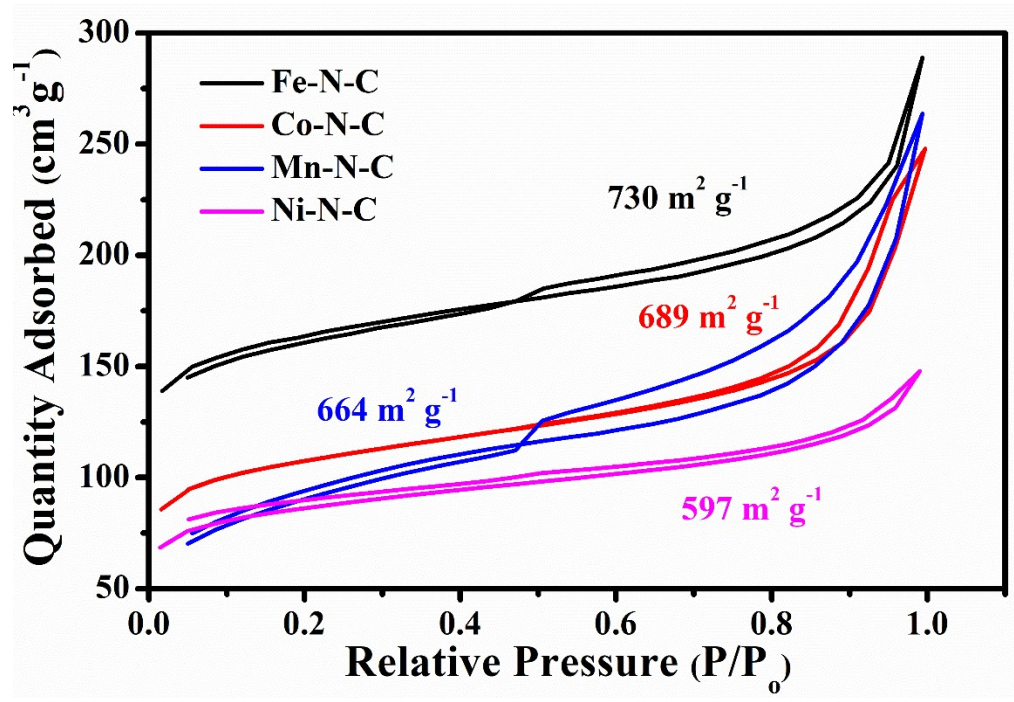

**Fig. S11.** N<sub>2</sub> adsorption-desorption isotherms for Fe-N-C SAC, Co-N-C SAC, Mn-N-C SAC, and Ni-N-C SAC.



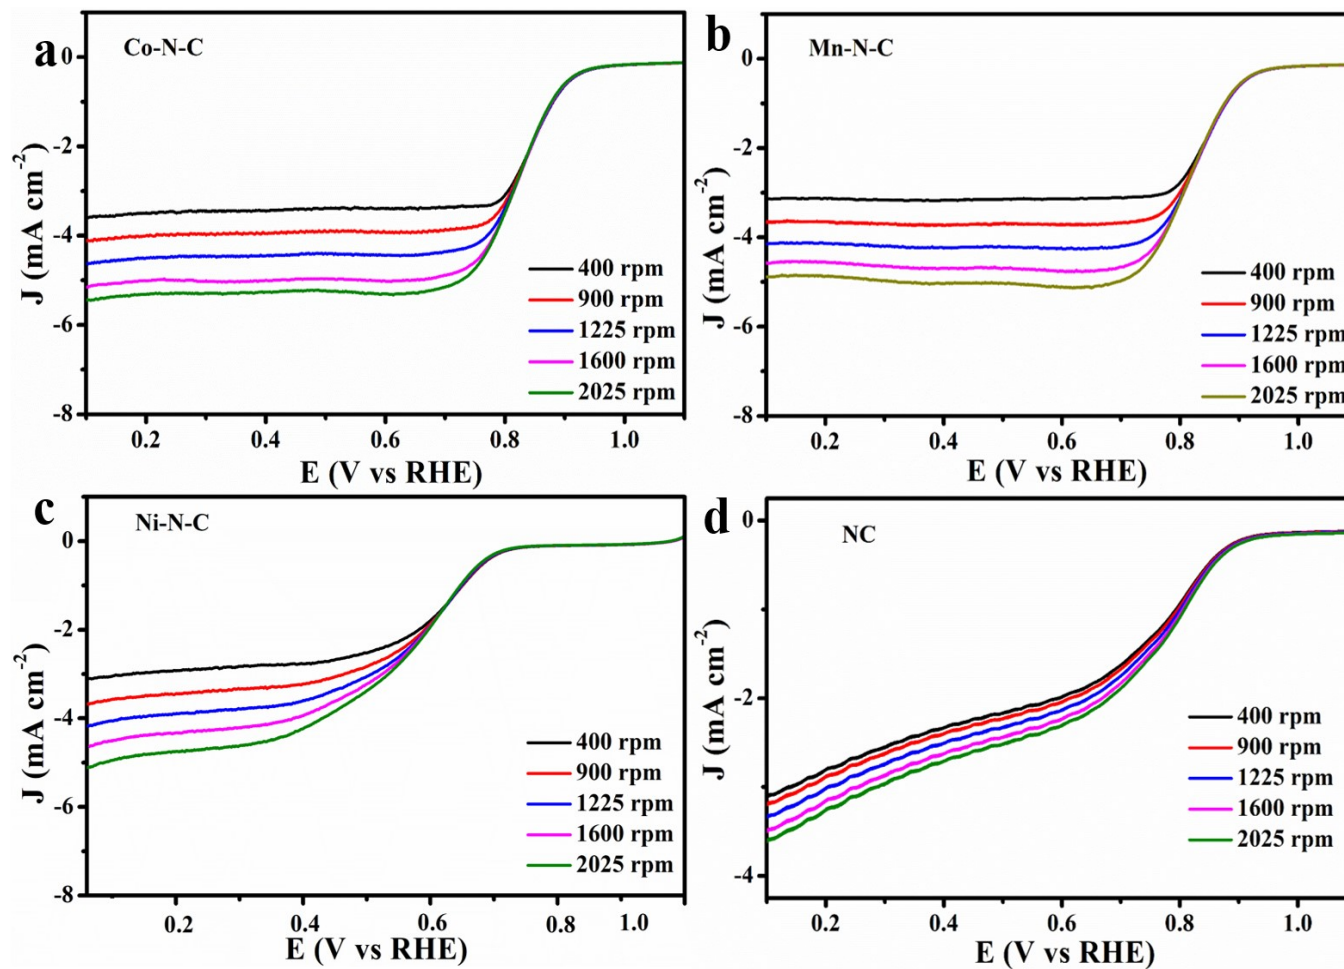

**Fig. S12.** LSV curves at different rpm in O<sub>2</sub> saturated 0.1 M KOH solution for (a) Co-N-C SAC; (b) Mn-N-C SAC; (c) Ni-N-C SAC; (d) NC.

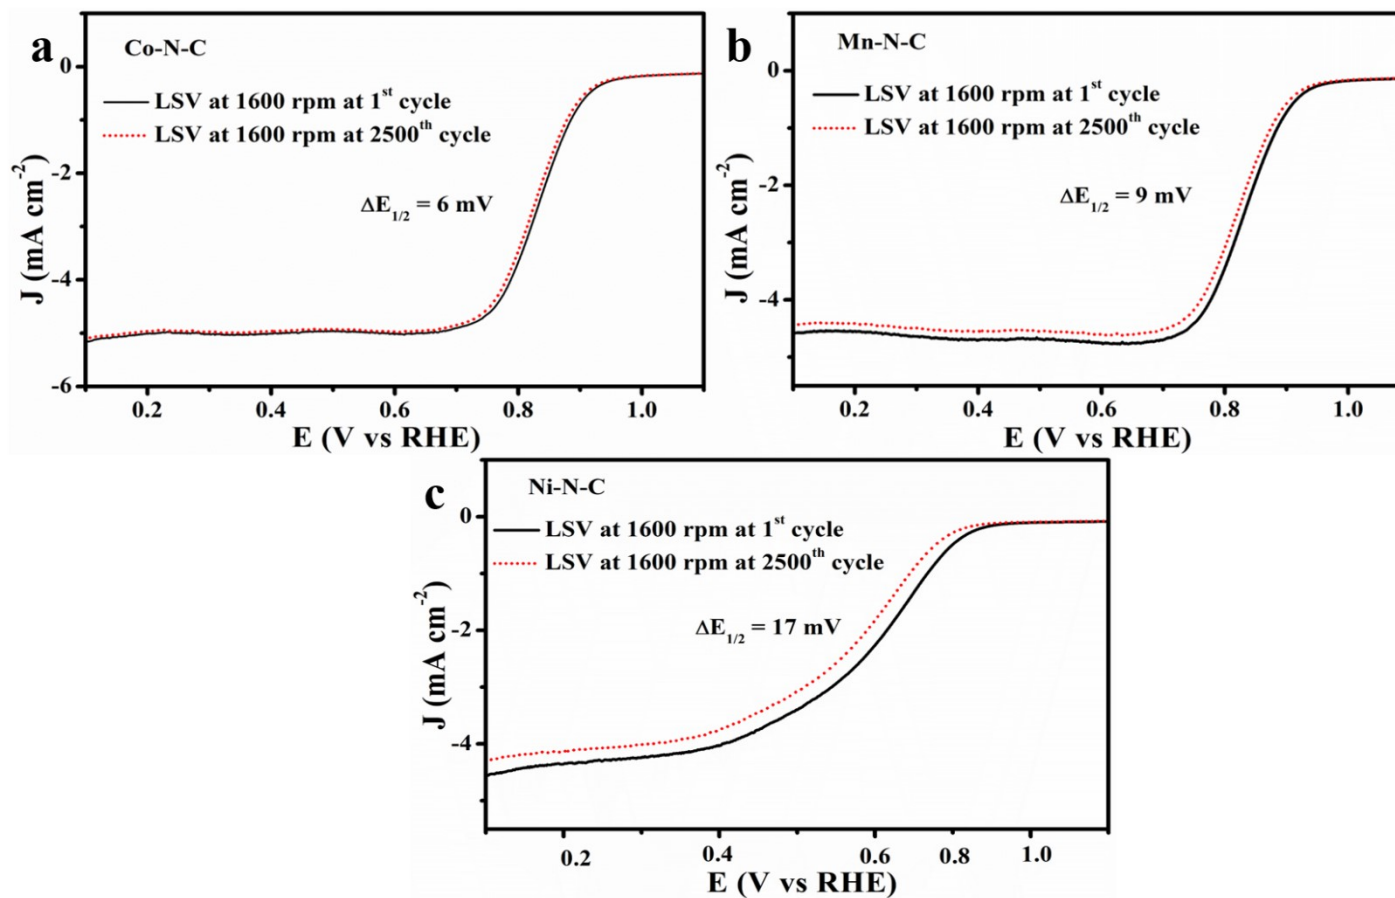

**Fig. S13.** LSV curves at 1600 rpm at 1<sup>st</sup> cycle and at 2500<sup>th</sup> cycle in O<sub>2</sub> saturated 0.1 M KOH solution for (a) Co-N-C SAC; (b) Mn-N-C SAC; (c) Ni-N-C SAC.

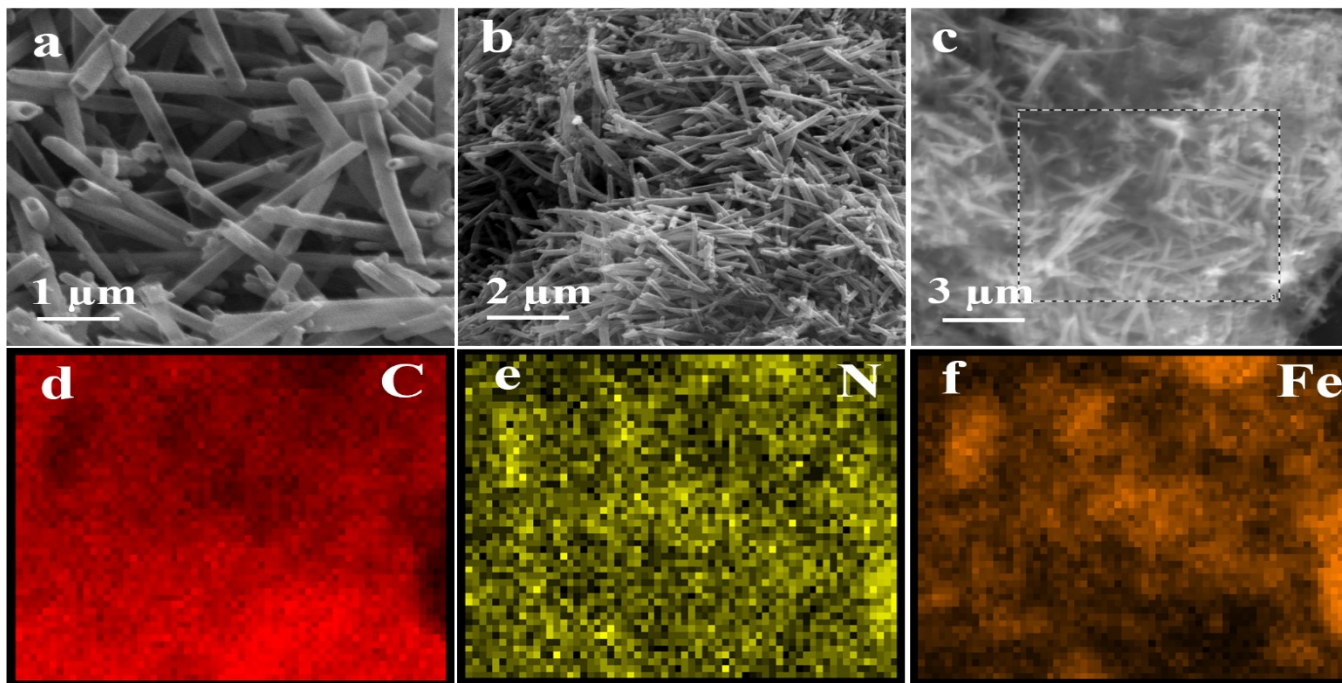

**Fig. S14.** (a, b) SEM for Fe-N-C after stability test of 2500<sup>th</sup> cycle, (c-f) corresponding EDS mapping.



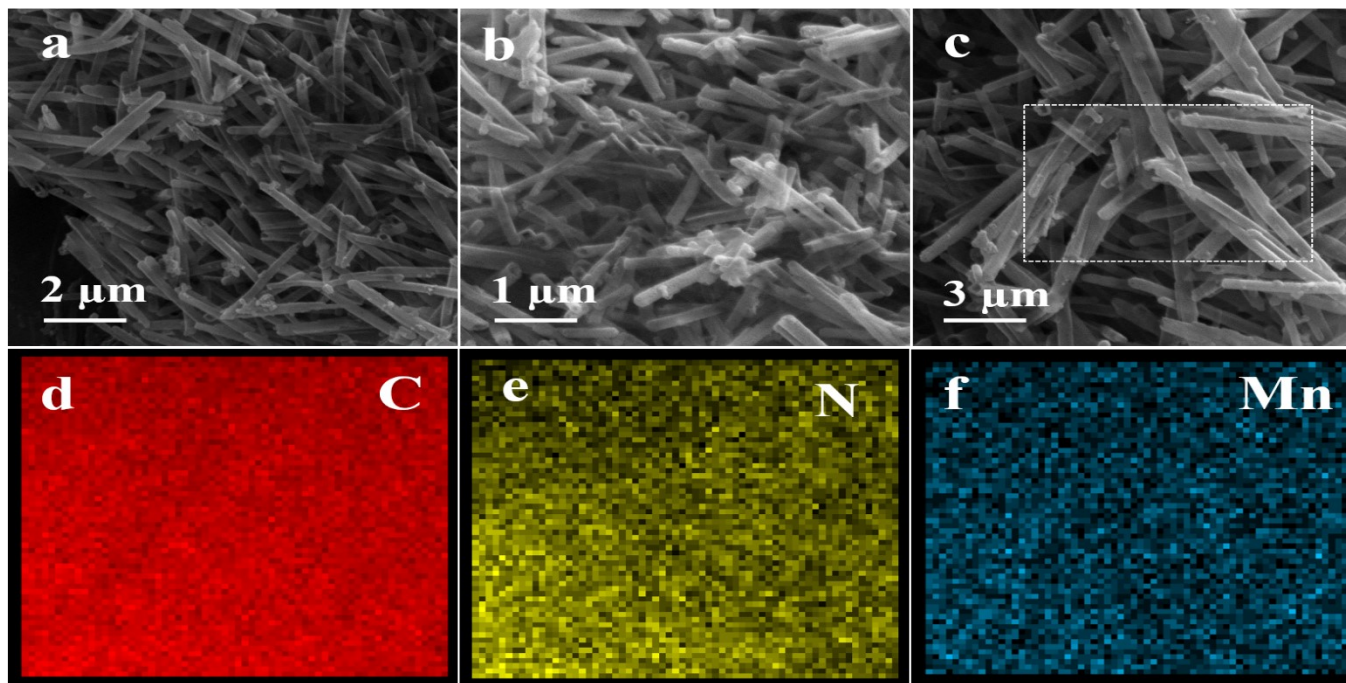

**Fig. S15.** (a, b) SEM for Mn-N-C after stability test of 2500<sup>th</sup> cycle, (c-f) corresponding EDS mapping.

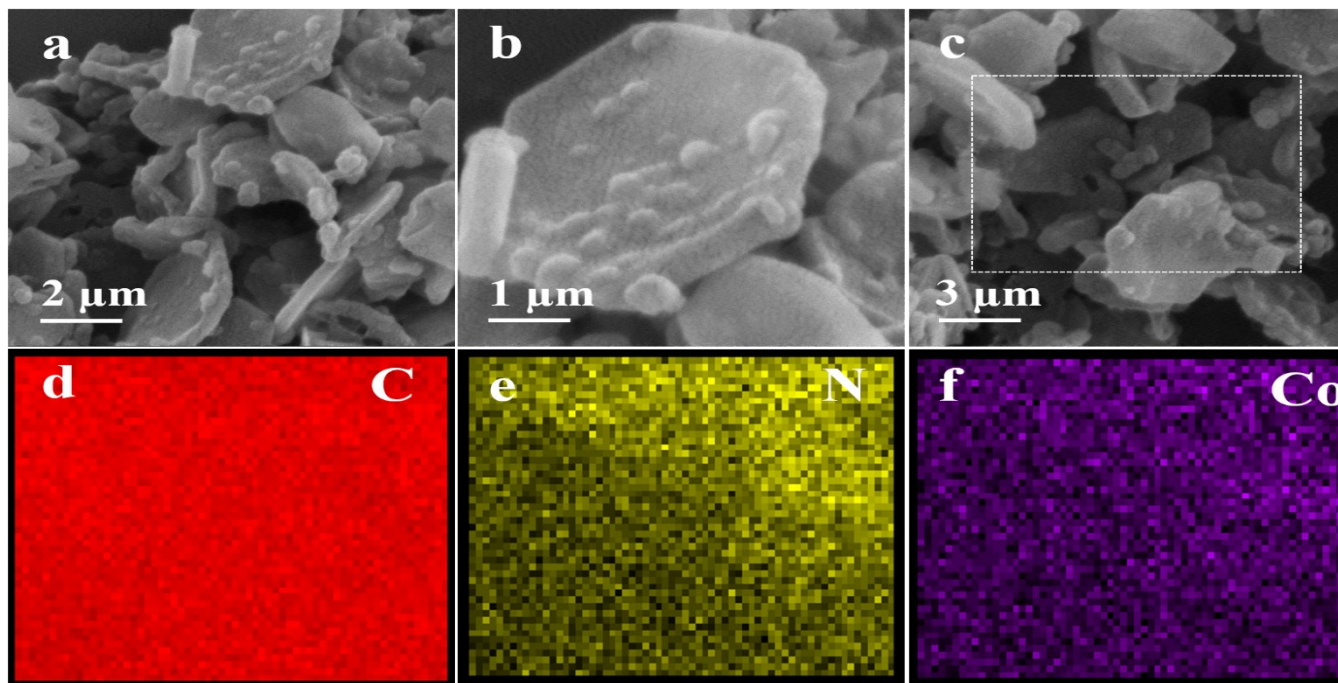

**Fig. S16.** (a, b) SEM for Co-N-C after stability test of 2500<sup>th</sup> cycle, (c-f) corresponding EDS mapping.

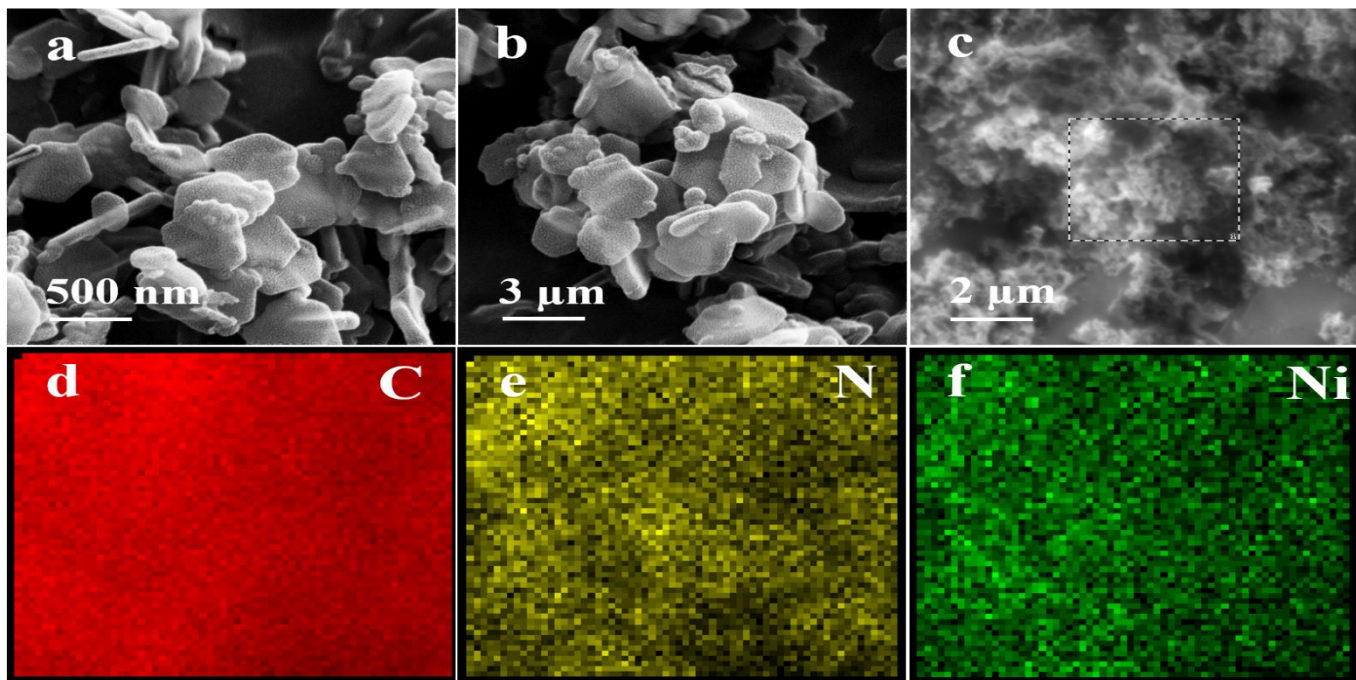

**Fig. S17.** (a, b) SEM for Ni-N-C after stability test of 2500<sup>th</sup> cycle, (c-f) corresponding EDS mapping.

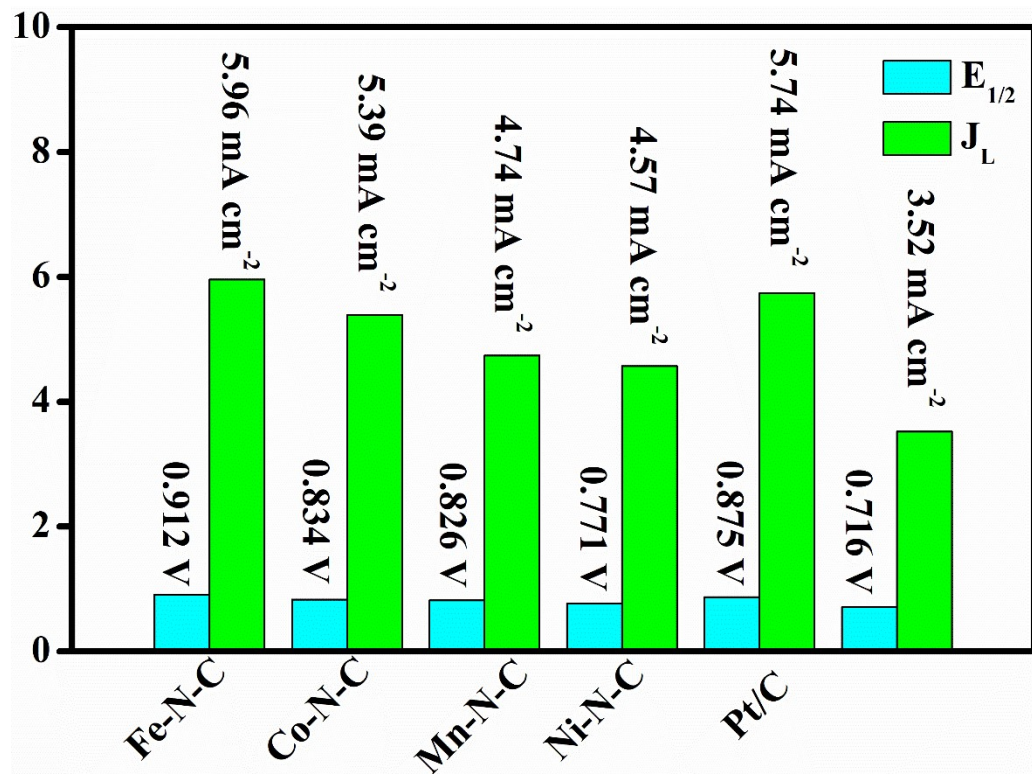

**Fig. S18.** Comparative ORR catalytic performance in  $\text{O}_2$  saturated 0.1 M KOH solution for the Fe-N-C SAC, Co-N-C SAC, Mn-N-C SAC, Ni-N-C SAC, 20% Pt/C, and NC.



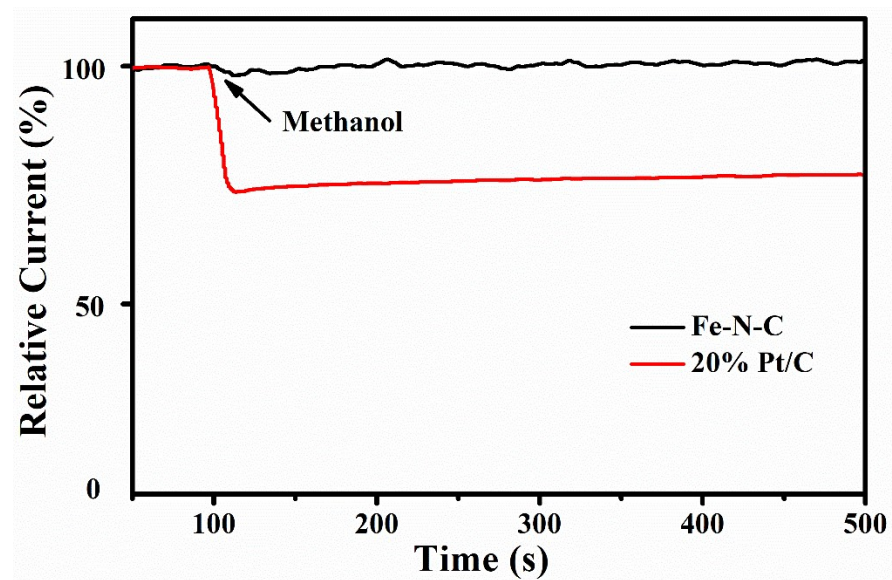

Fig. S19. Methanol tolerance test for Fe-N-C SAC and 20% Pt/C.

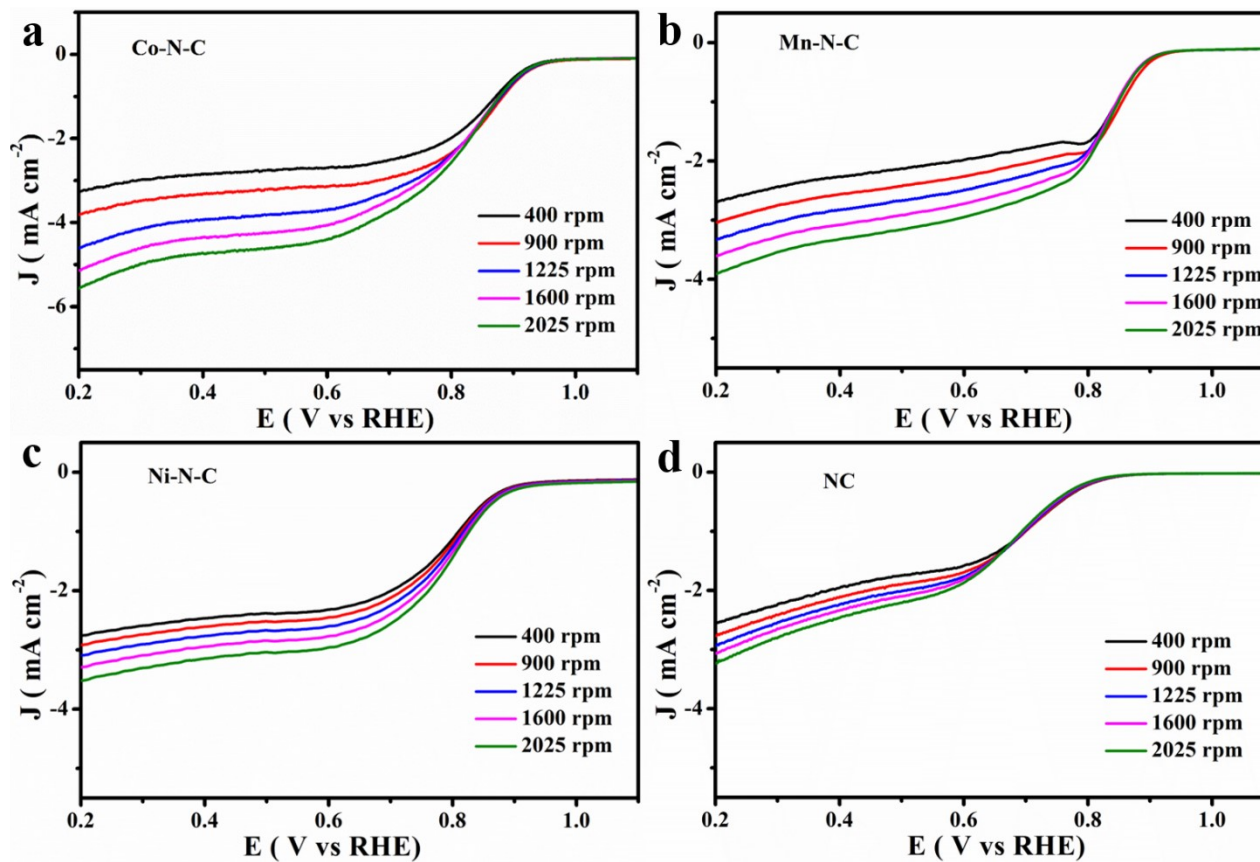

**Fig. S20.** LSV curves at different rpm in  $\text{O}_2$  saturated 0.1 M  $\text{HClO}_4$  solution for (a) Co-N-C SAC; (b) Mn-N-C SAC; (c) Ni-N-C SAC; (d) NC.

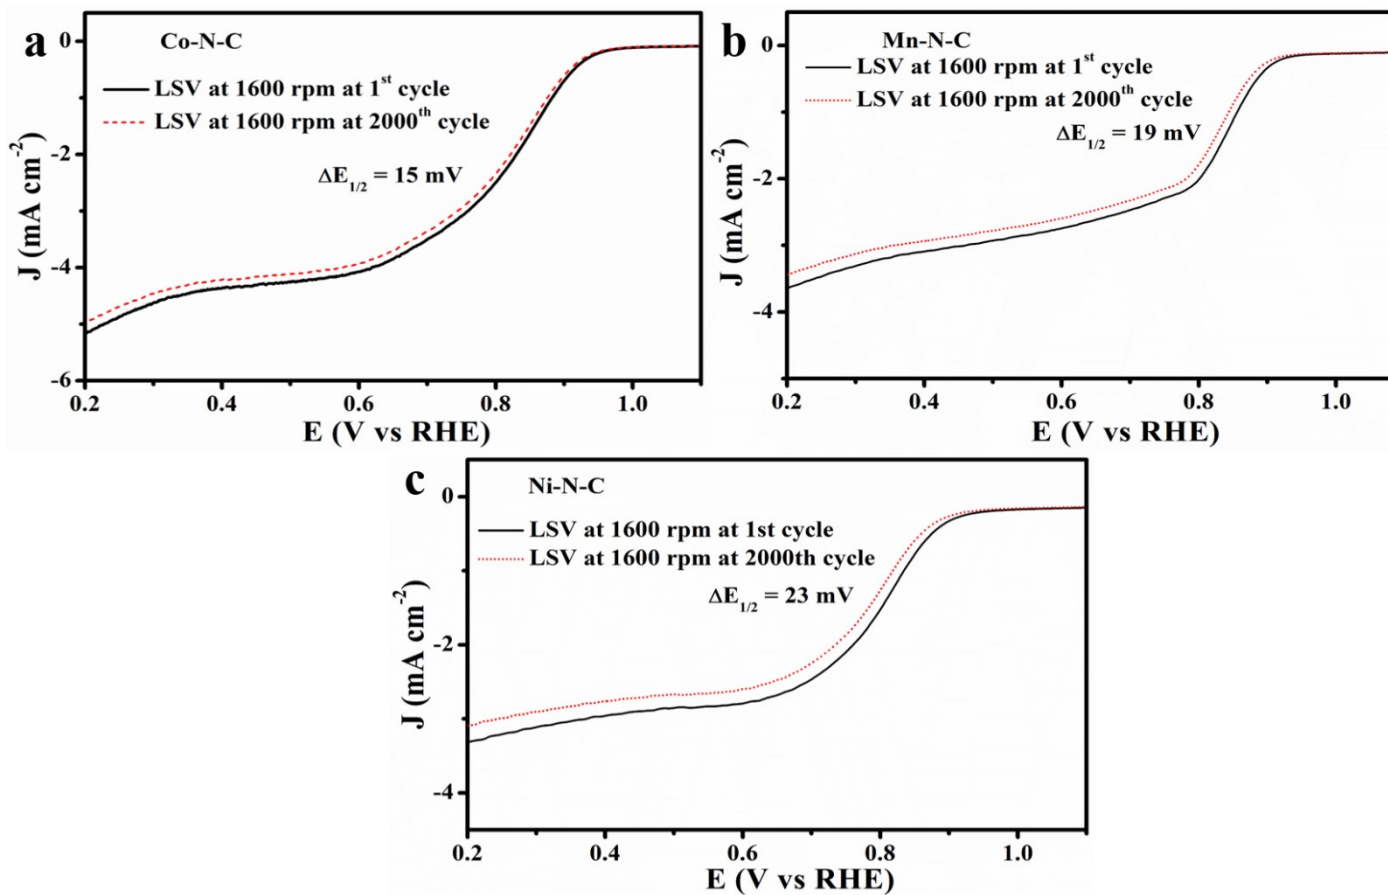

**Fig. S21.** LSV curves at 1600 rpm at 1<sup>st</sup> cycle and after 2000<sup>th</sup> cycle in O<sub>2</sub> saturated 0.1 M HClO<sub>4</sub> solution for (a) Co-N-C SAC; (b) Mn-N-C SAC; (c) Ni-N-C SAC.

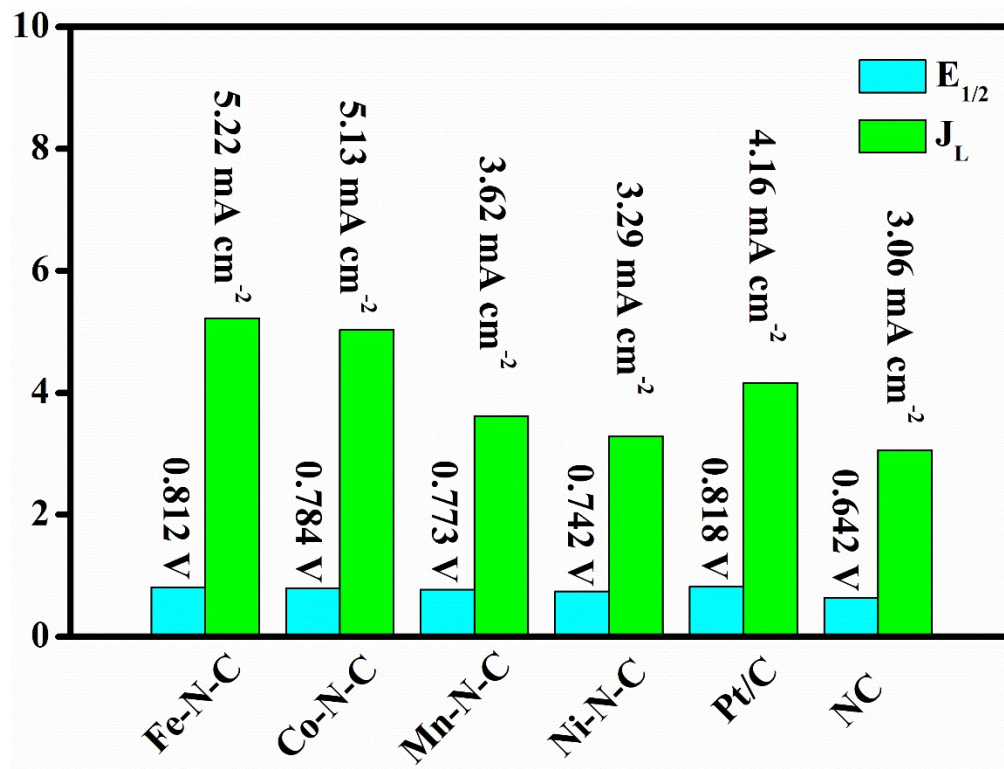

**Fig. S22.** Comparative ORR catalytic performance in  $\text{O}_2$  saturated 0.1 M  $\text{HClO}_4$  solution for Fe-N-C SAC, Co-N-C SAC, Mn-N-C SAC, Ni-N-C SAC, 20% Pt/C, and NC.



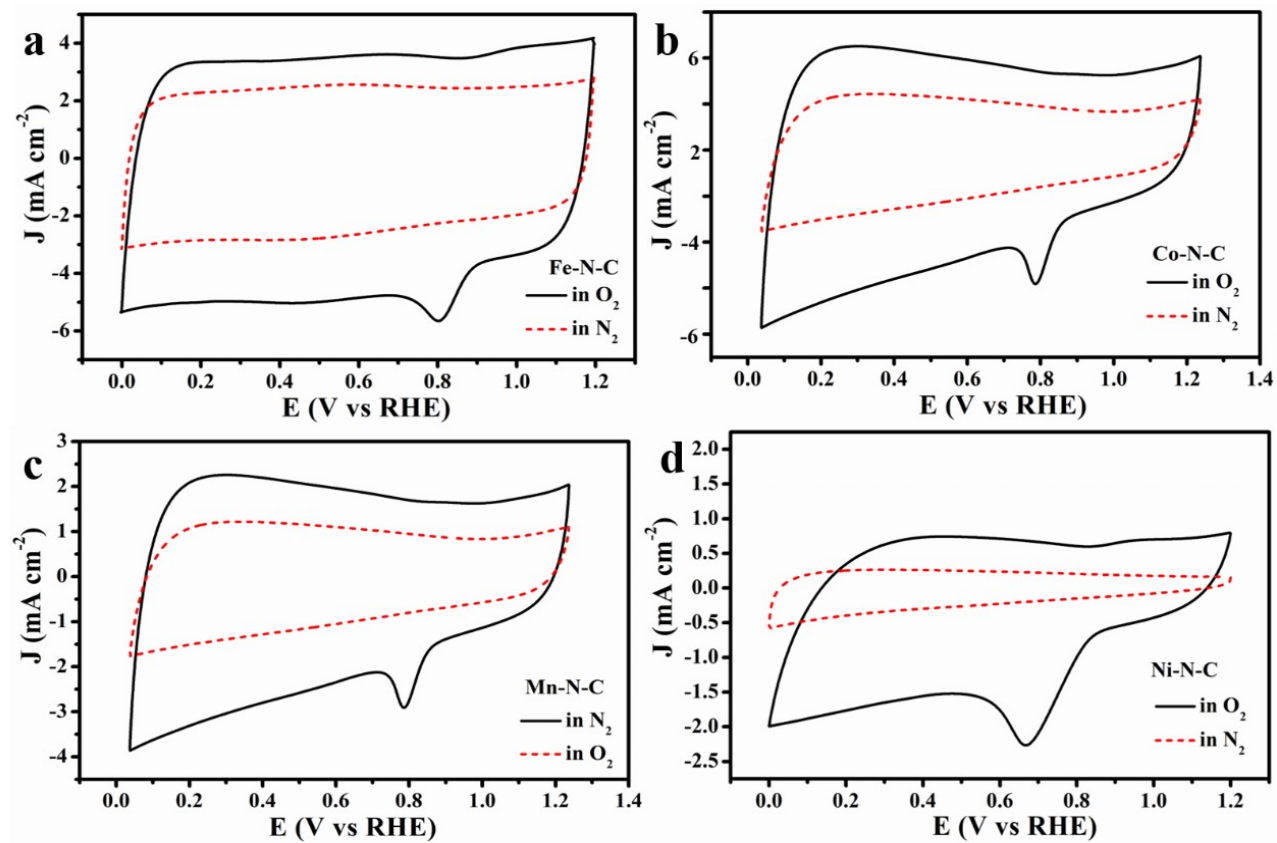

**Fig. S23.** CV curves in 0.1 M KOH for (a) Fe-N-C SAC; (b) Co-N-C SAC; (c) Mn-N-C SAC; (d) Ni-N-C SAC.

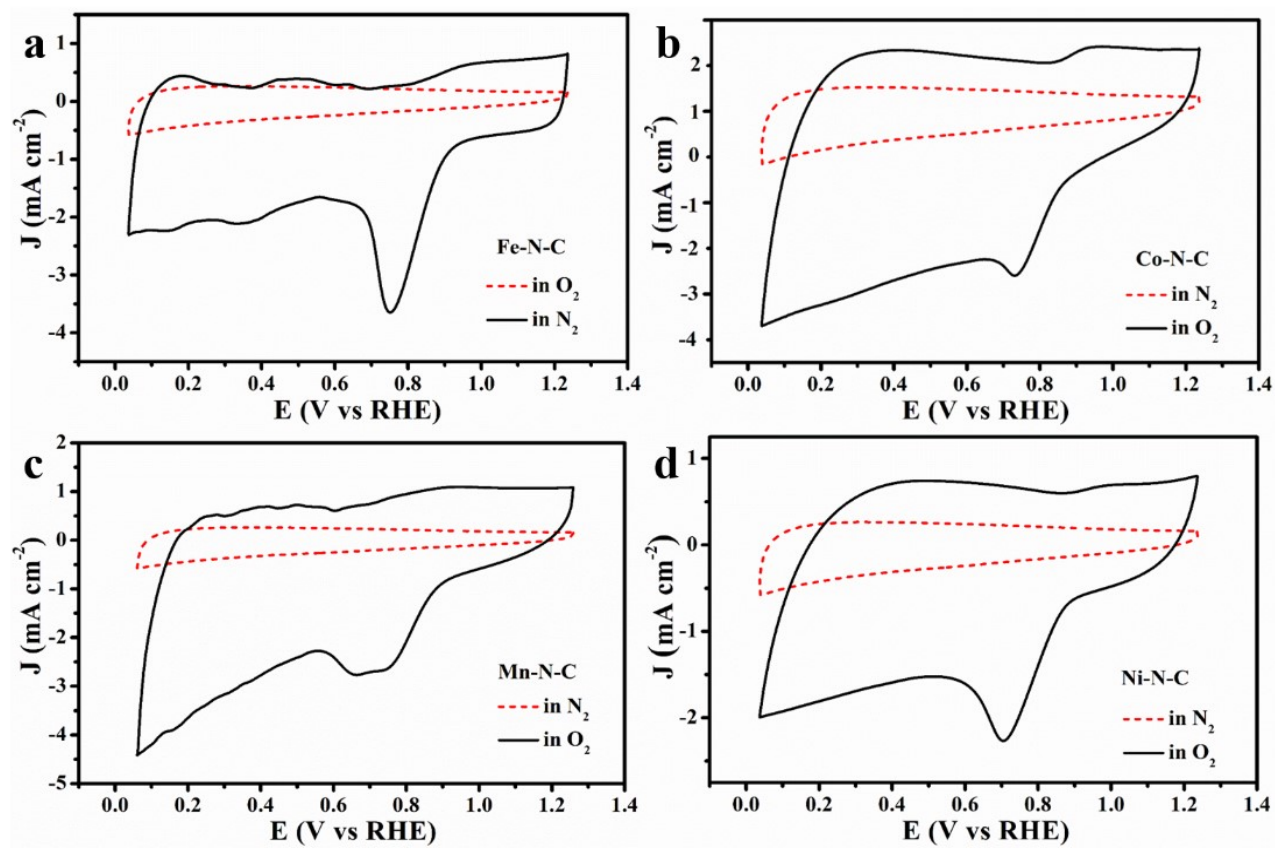

**Fig. S24.** CV curves in  $0.1 \text{ M HClO}_4$  for (a) Fe-N-C SAC; (b) Co-N-C SAC; (c) Mn-N-C SAC; (d) Ni-N-C SAC.

Table S1: Fe atomic percentage from ICP-OES

| <b>Catalyst</b> | <b>Metal content (wt. %)</b> |
|-----------------|------------------------------|
| Fe-N-C          | 2.83                         |
| Co-N-C          | 0.97                         |
| Mn-N-C          | 0.86                         |
| Ni-N-C          | 0.79                         |

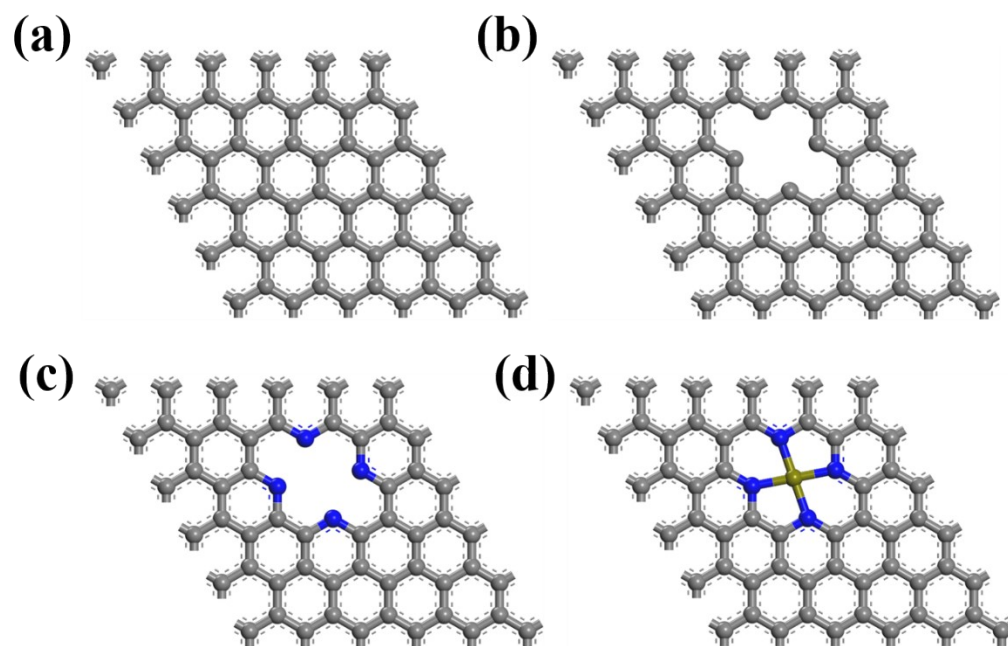

Fig. S25. (a) Graphene, (b) graphene quadruple vacancy (QV), (c) graphene quadruple vacancy (QV) with N atoms, (d) M-N-C. Grey: C, blue: N, and green: M (M = Fe, Co, Mn, and Ni) atoms, respectively.

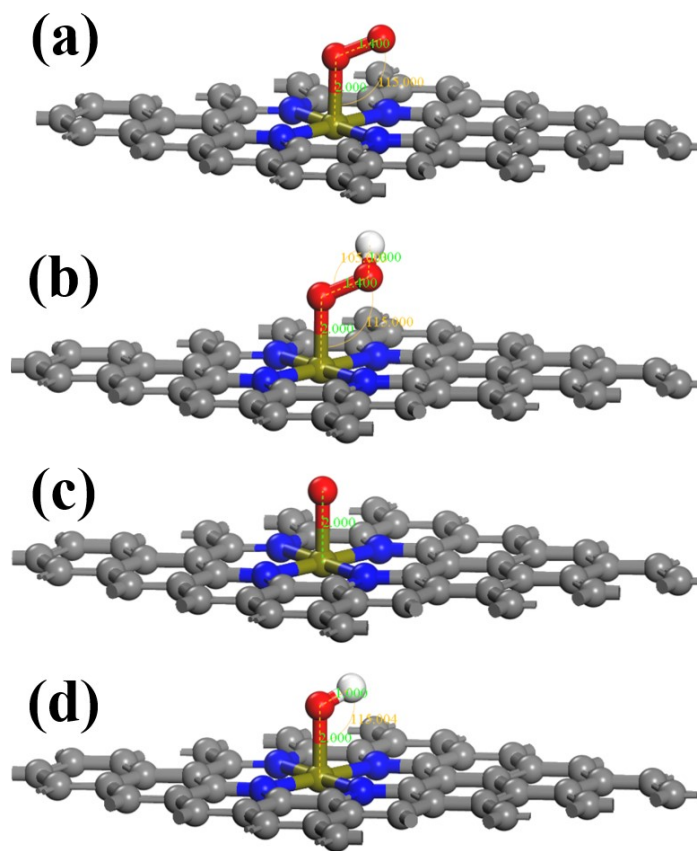

Fig. S26. Intermediates (a)  $O_2$ , (b)  $-OOH$ , (c)  $O^*$ , and (d)  $OH^*$  on M-N-C.

Table S2: Comparative literature for M-N-C SAC catalyst

| Catalyst               | Loading amount of<br>the catalyst<br>(mg cm <sup>-2</sup> ) | E <sub>1/2</sub> in acid<br>(V) | E <sub>1/2</sub> in base<br>(V) | ZAB Performance<br>(mW cm <sup>-2</sup> ) | Reference        |
|------------------------|-------------------------------------------------------------|---------------------------------|---------------------------------|-------------------------------------------|------------------|
| Co@NC-MOF              | 0.6                                                         | 0.72                            | 0.88                            | -                                         | 1                |
| Co-N-C                 | 0.8                                                         | -                               | 0.85                            | 227                                       | 2                |
| Co-N-C                 |                                                             |                                 | 0.82                            | 135                                       | 3                |
| Fe-N-C                 | 0.6                                                         | 0.80                            | 0.88                            | -                                         | 4                |
| Fe-N-C                 | 0.65                                                        | -                               | 0.82                            | -                                         | 5                |
| Fe-N-C-NH <sub>3</sub> | 0.4                                                         | 0.65                            | 0.85                            | -                                         | 6                |
| Fe-N-C                 | 0.4                                                         | -                               | 0.87                            | 185                                       | 7                |
| Mn-N-C                 | 0.6                                                         | -                               | 0.81                            | -                                         | 8                |
| Fe-N-C                 | 0.6                                                         | -                               | 0.83                            | 71.6                                      | 9                |
| Fe-N-C                 | 0.5                                                         | -                               | 0.89                            | -                                         | 10               |
| Mn-N-C                 | 0.8                                                         | 0.74                            | -                               |                                           | 11               |
| Fe-N-C                 | 0.4                                                         | 0.80                            | 0.91                            | 185                                       | <b>This work</b> |

---

|        |      |      |
|--------|------|------|
| Co-N-C | 0.78 | 0.83 |
| Mn-N-C | 0.77 | 0.82 |
| Ni-N-C | 0.72 | 0.76 |

---

## References

1. S. G. Peera, J. Balamurugan, N. H. Kim and J. H. Lee, *Small*, 2018, **14**, e1800441.
2. C. Lei, R. Yang, J. Zhao, W. Tang, F. Miao, Q. Huang and Y. Wu, *Frontiers in Energy*, 2024, DOI: 10.1007/s11708-024-0928-6.
3. H. Wang, X. Zhang, X. Li, Y. Li, D. Kong, Z. Zhen, L. Geng, L. Zhi and Z. Li, *Renewables*, 2023, **1**, 353-361.
4. J.-W. Huang, Q.-Q. Cheng, Y.-C. Huang, H.-C. Yao, H.-B. Zhu and H. Yang, *ACS Applied Energy Materials*, 2019, **2**, 3194-3203.
5. C. Maouche, Y. Zhou, B. Li, C. Cheng, Z. Wu, X. Han, S. Rao, Y. Li, N. Rahman and J. Yang, *Journal of The Electrochemical Society*, 2022, **169**, 062501.
6. Z. Chen, D. Zhao, C. Chen, Y. Xu, C. Sun, K. Zhao, M. Arif Khan, D. Ye, H. Zhao, J. Fang, X. Andy Sun and J. Zhang, *Journal of colloid and interface science*, 2021, **582**, 1033-1040.
7. M. Arif Khan, C. Sun, J. Cai, D. Ye, K. Zhao, G. Zhang, S. Shi, L. Ali Shah, J. Fang, C. Yang, H. Zhao, S. Mu and J. Zhang, *ChemElectroChem*, 2021, **8**, 1298-1306.
8. L. Xiao, J.-M. Yang, G.-Y. Huang, Y. Zhao and H.-B. Zhu, *Inorganic Chemistry Communications*, 2020, **118**, 107982.
9. J. Li, M. Lin, W. Huang, X. Liao, Y. Ma, L. Zhou, L. Mai and J. Lu, *Small methods*, 2023, **7**, e2201664.

10. H. Gharibi, K. Tadavani, H. Balali Dehkordi and M. Zhiani, *Energy & Fuels*, 2023, **37**.
11. T. Stracensky, L. Jiao, Q. Sun, E. Liu, F. Yang, S. Zhong, D. A. Cullen, D. J. Myers, A. J. Kropf, Q. Jia, S. Mukerjee and H. Xu, *ACS Catalysis*, 2023, **13**, 14782-14791.
